# Supplementary material for: Impacts of Shade Trees on the Adjacent Cacao Rhizosphere in a Young Diversified Agroforestry System
Source: MDPI journal article supplement (doi:10.3390/agronomy12010195), 2022-01-13
Supplement: s1 [file s1]

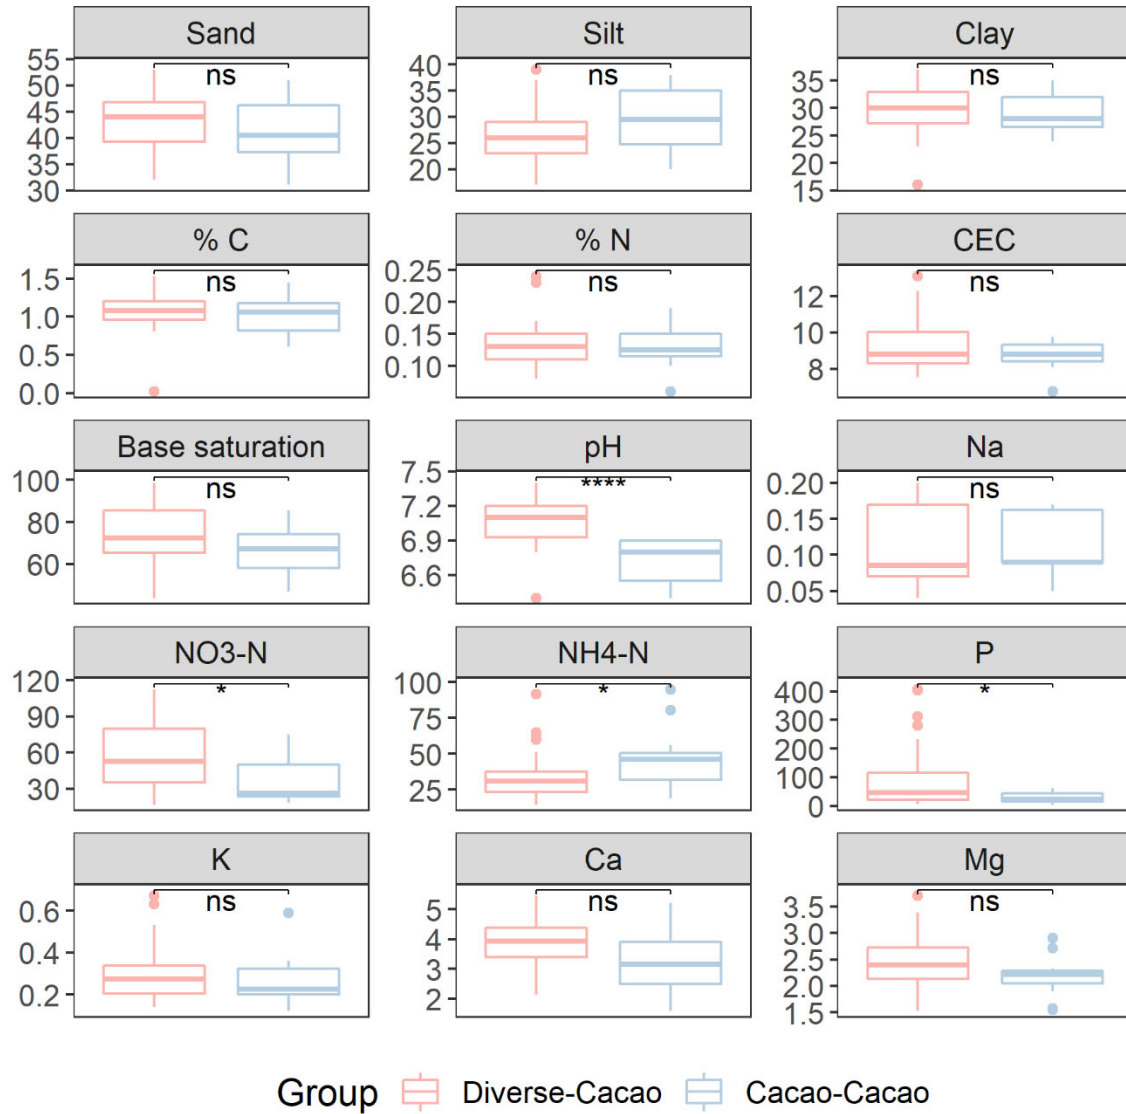

**Figure S1.** Effects of adjacent shade trees on cacao rhizosphere soil physicochemical parameters. Diverse-Cacao indicates samples taken from cacao trees with adjacent shade trees, and Cacao-Cacao indicates samples from cacao trees only surrounded by other cacao trees. CEC: cation exchange capacity. \*:  $p < 0.05$ , \*\*:  $p < 0.01$ , \*\*\*:  $p < 0.001$ , \*\*\*\*:  $p < 0.0001$ .

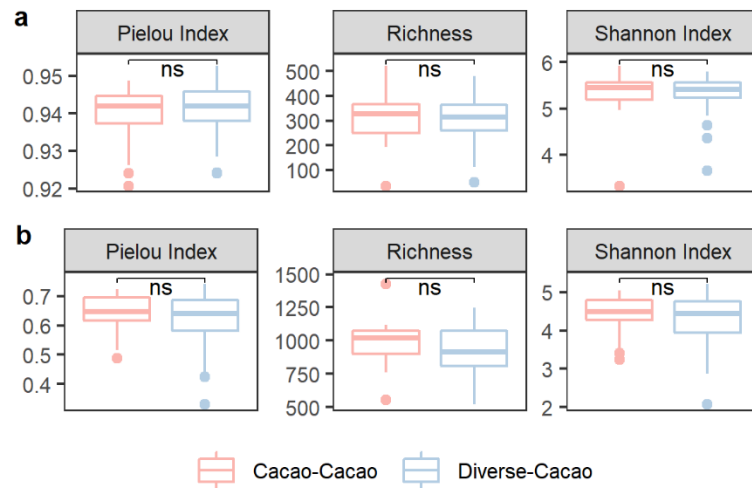

**Figure S2.** Effects of shade tree presence on microbial alpha diversity. Shade trees did not affect **(a)** bacterial or **(b)** fungal alpha diversity indices for cacao rhizosphere microbial communities. Diverse-Cacao indicates cacao trees with adjacent shade trees, while Cacao-Cacao indicates cacao trees with only adjacent cacao trees.

a

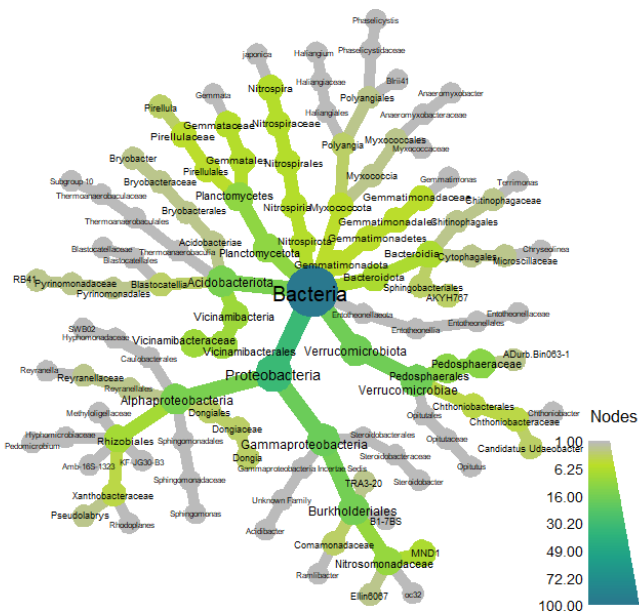

b

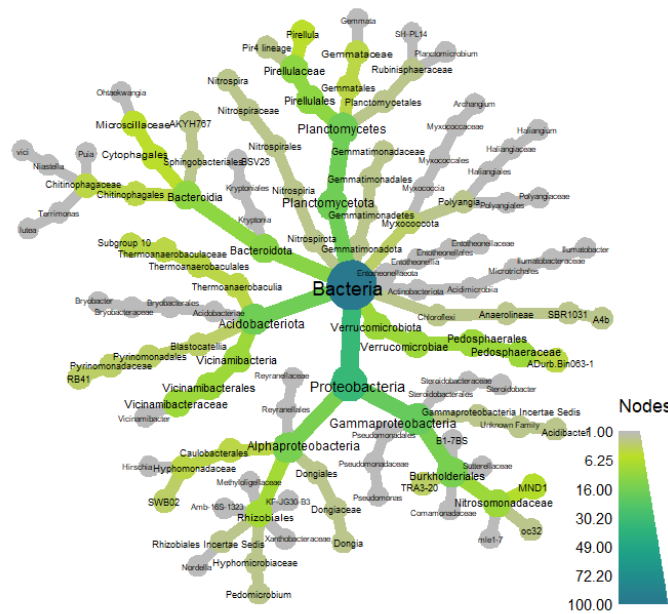

c

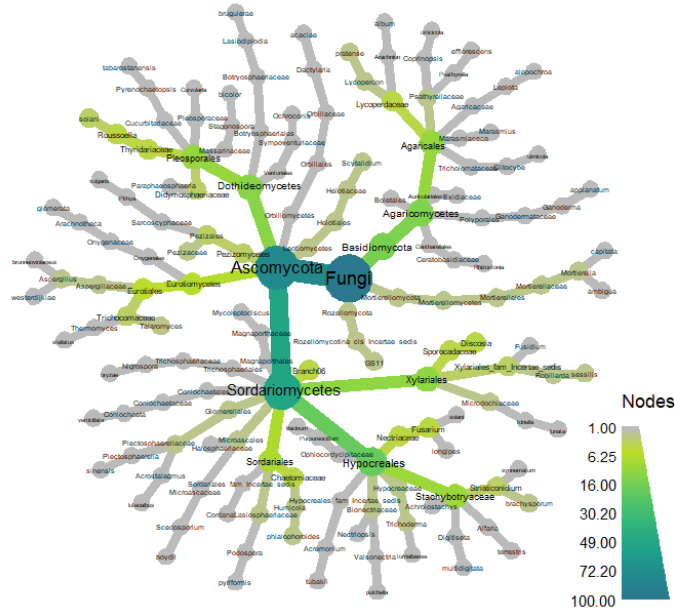

**Figure S3.** Phylogenetic heat trees of yield-relevant microbial taxa. Phylogenetic trees were generated for the 100 ASVs with the highest loadings on eigenvectors of microbial community composition shown to be relevant to cacao yields in stepwise regression. **(a)** PC1B and **(b)** PC2B, the first and second eigenvectors of bacterial community composition, were important predictors of infected pod counts. **(c)** PC2F, the second eigenvector of fungal community composition, was an important predictor for both healthy and infected pods. Larger nodes indicate higher numbers of ASVs per taxon.

**Table S1: Plant species included in trial**

| Name          | Scientific Name             | Category                    | Number of Trees / Plants |
|---------------|-----------------------------|-----------------------------|--------------------------|
| Cocoa (MCC02) | <i>Theobroma cacao</i>      | Cocoa                       | 244                      |
| Cocoa (BB01)  | <i>Theobroma cacao</i>      | Cocoa                       | 9                        |
| Sengon        | <i>Falcataria moluccana</i> | Shade                       | 9                        |
| Red Teak      | <i>Tectona grandis</i>      | Timber                      | 8                        |
| Mahogany      | <i>Swietenia mahagoni</i>   | Timber                      | 17                       |
| Mango         | <i>Mangifera indica</i>     | Fruits                      | 5                        |
| Durian        | <i>Durio sp.</i>            | Fruits                      | 4                        |
| Banana        | <i>Musa sp.</i>             | Fruits                      | 30                       |
| Papaya        | <i>Carica papaya</i>        | Fruits                      | 40                       |
| Pineapple     | <i>Ananas comosus</i>       | Fruits                      | 75                       |
| Damiana       | <i>Turnera subulata</i>     | Flowers, pollinator support | 30                       |
| Hibiscus      | <i>Hibiscus sp.</i>         | Flowers, pollinator support | 17                       |
| Chili         | <i>Capsicum frutescens</i>  | Spices                      | 120                      |
| Nutmeg        | <i>Myristica fragrans</i>   | Spices                      | 5                        |
| Lemongrass    | <i>Cymbopogon sp.</i>       | Spices                      | 90                       |

**Table S2: Soil amendments at planting**

| Planting Holes Fertilizer |         |                               |
|---------------------------|---------|-------------------------------|
| Fertilizer Type           | Kg/Tree | Plant Type                    |
| NPK                       | 0.15    | Cocoa, Fruit trees,<br>Timber |
| Dolomite                  | 0.4     |                               |
| TSP (36%)                 | 0.15    |                               |
| Compost                   | 3       |                               |
| NPK                       | 0.15    | Pineapple, Banana             |
| Dolomite                  | 0.4     |                               |
| Compost                   | 3       |                               |

**Table S3: Soil amendments over time**

| Fertilizer Type | Year 1, 2018 (Kg Per Tree), Cocoa |      |           |          |
|-----------------|-----------------------------------|------|-----------|----------|
|                 | March                             | June | September | December |
| NPK             | 0.02                              |      | 0.04      | 0.08     |
| Dolomite        |                                   |      | 0.25      |          |
| Compost         |                                   |      |           | 3        |
| Nitrogen        | 0.01                              |      | 0.02      | 0.04     |
|                 | Year 2, 2019 (Kg Per Tree), Cocoa |      |           |          |
| NPK             | 0.1                               | 0.1  | 0.15      | 0.12     |
| Dolomite        |                                   | 0.4  |           | 0.5      |
| Compost         |                                   |      |           |          |
| Nitrogen        | 0.05                              | 0.05 | 0.06      | 0.06     |
|                 | Year 3, 2020 (Kg Per Tree), Cocoa |      |           |          |
| NPK             |                                   | 0.2  |           | 0.3      |
| Dolomite        |                                   |      |           |          |
| Compost         |                                   |      |           |          |
| Nitrogen        |                                   | 0.1  |           | 0.1      |
|                 | Year 4, 2021 (Kg Per Tree), Cocoa |      |           |          |
| NPK             |                                   | 0.25 |           |          |
| Dolomite        |                                   | 0.5  |           |          |
| Compost         |                                   | 3    |           |          |
| Nitrogen        |                                   | 0.1  |           |          |
